# Supplementary material
Source: Research Square preprint supplement (doi:10.21203/rs.3.rs-8979308/v1)
Supplement: Supplementary file 1 [file 48ef4752b06cea4302758ba4.docx]

**Table S1 Primer sequences for gene amplification**

| Primer name | Primer sequence（5’→3’） |
| --- | --- |
| *bpe275*-JC-F | TGCGTTCACGCTGATTCGT |
| *bpe275*-JC-R | TCTGTCCACTGGCCGTTATG |
| Puc19- *bpe275*-up-F | TACCCGGGGATCCTCTAGAGAAACCGGCGTTCTGGC |
| Puc19- *bpe275*-up-R | ACCGTAAGGGGCGCCTGCCGATCCTGCGCCATTTCTGG |
| Puc19- *bpe275*-down-F | CGGCAGGCGCCC |
| Puc19- *bpe275*-down-R | CTTGCATGCCTGCAGGTCGATCAGGCCCGCCCG |

Note: In primer nomenclature, “up” and “down” represent the upstream and downstream homologous arms, respectively; pUC19 serves as the suicide vector backbone.
